# Supplementary material for: DNA demethylase ALKBH1 promotes adipogenic differentiation via regulation of HIF-1 signaling
Source: PubMed Central journal article supplement — J Biol Chem. 2021 Dec 17;298(1):101499. doi: 10.1016/j.jbc.2021.101499 (PMC8760519; doi:10.1016/j.jbc.2021.101499), 2021-12-17

# DNA demethylase ALKBH1 promotes adipogenic differentiation via regulation of HIF-1 signaling

Yuting Liu<sup>1</sup>, Yaqian Chen<sup>1</sup>, Yuan Wang<sup>1</sup>, Shuang Jiang<sup>1</sup>, Weimin Lin<sup>1</sup>, Yunshu Wu<sup>1</sup>,  
Qiwen Li<sup>1</sup>, Yuchen Guo<sup>1</sup>, Weiqing Liu<sup>1</sup>, Quan Yuan<sup>1\*</sup>

<sup>1</sup>: *State Key Laboratory of Oral Diseases, National Clinical Research Center for Oral Diseases, West China Hospital of Stomatology, Sichuan University, #14 Third Section, Renmin Road South, Chengdu 610041, China.*

\* *Correspondence: E-mail address: yuanquan@scu.edu.cn*

## Supplementary Information

**Page 2** Figure S1

**Page 3** Figure S2, Figure S3

**Page 4** Figure S4, Figure S5

**Page 5** Table S1

**Page 6-8** Uncropped images of blots

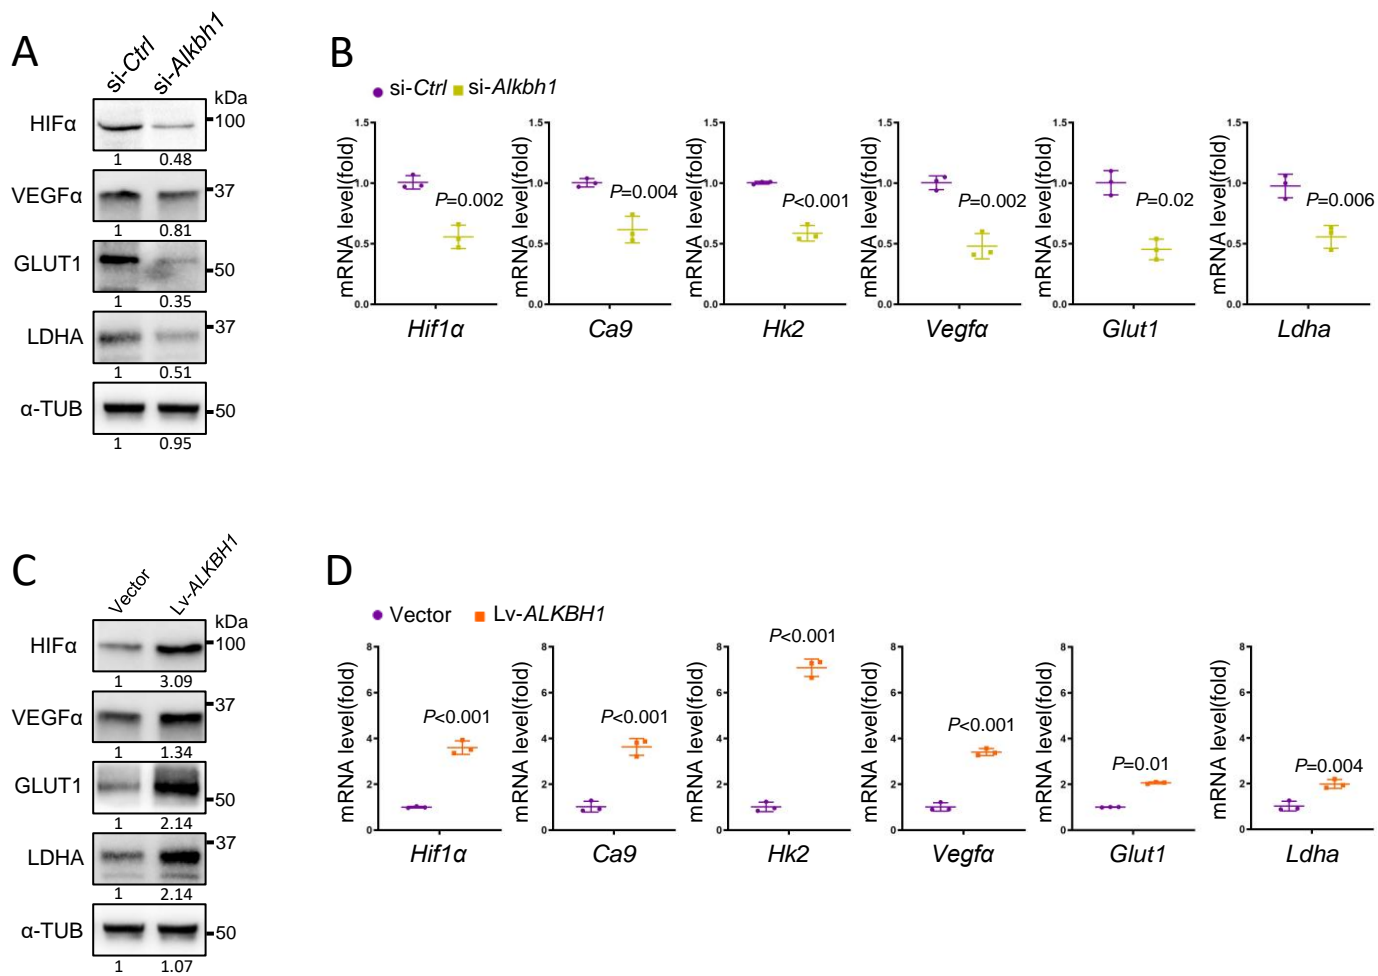

**Figure S1. ALKBH1 activates HIF-1 pathway in 5% oxygen conditions. (A)** Western blots of hypoxia-related proteins in *Alkbh1*-knocked 3T3-L1 cells in 5% oxygen conditions. **(B)** qRT-PCR analysis of *Hif-1α*, *Ca9*, *Hk2*, *Vegfa*, *Glut1* and *Ldha* in *Alkbh1*-deficient 3T3-L1 lines in 5% oxygen conditions (n=3). **(C)** Western blots and **(D)** qRT-PCR analysis confirm the activation of hypoxia axis in *ALKBH1*-overexpressed cells under 5% concentration of oxygen (n=3). The *P* values were calculated by two-tailed Student's *t* test. Scatter plots show individual data points  $\pm$  SD.

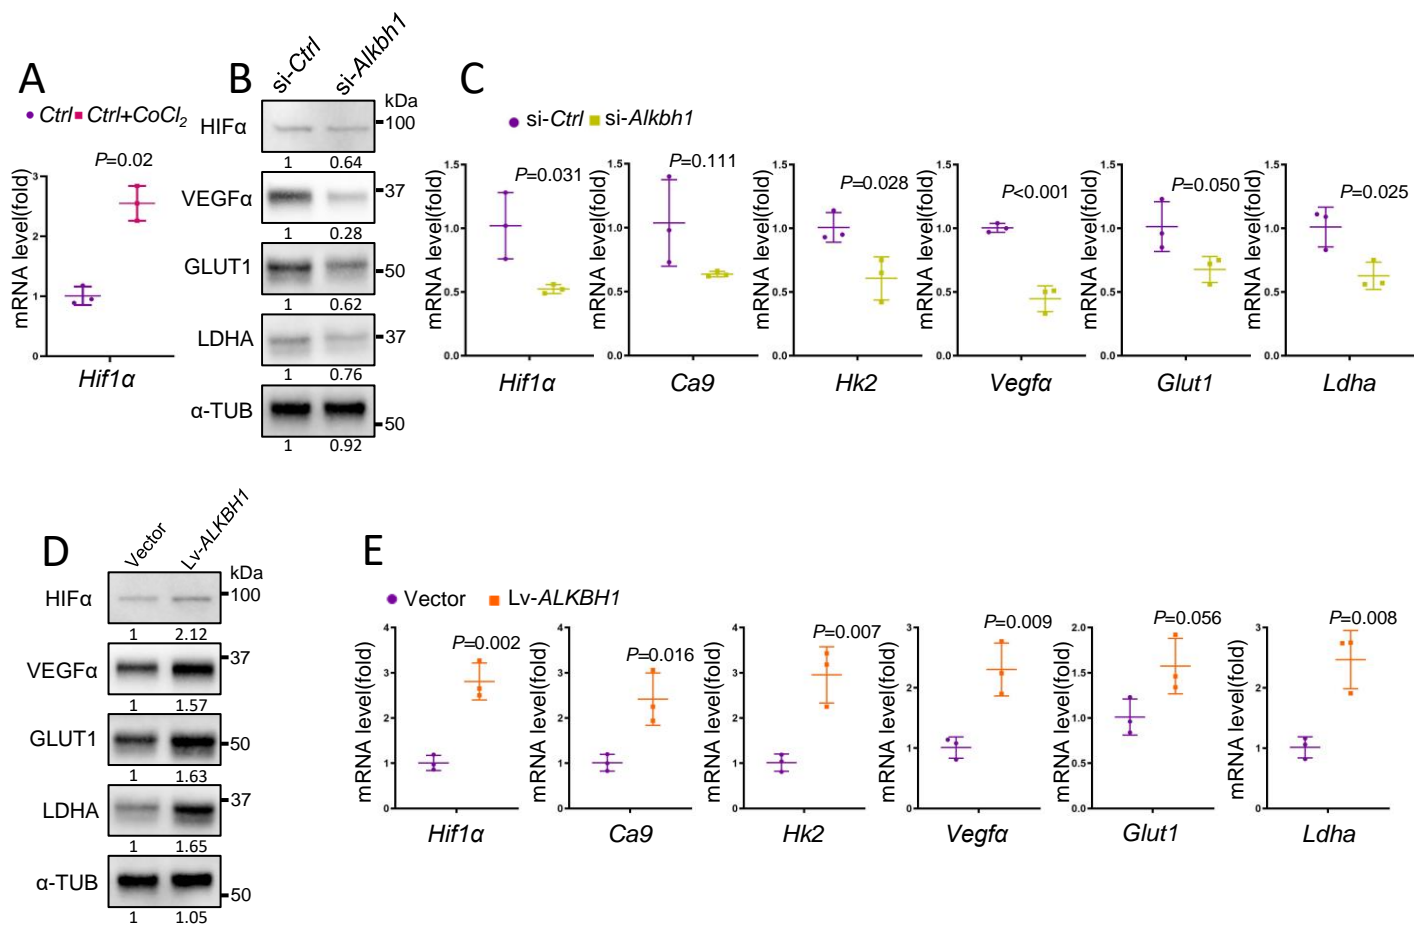

**Figure S2. ALKBH1 activates HIF-1 pathway in hypoxia induced by CoCl<sub>2</sub>.** (A) qRT-PCR of *Hif-1 $\alpha$*  at 24-hour treatment of CoCl<sub>2</sub>. CoCl<sub>2</sub> activates HIF-1 pathway in 3T3-L1 cells (n=3). (B) Western blots of hypoxia-related proteins in *Alkbh1*-knocked 3T3-L1 cells in hypoxia induced by CoCl<sub>2</sub>. (C) qRT-PCR analysis of *Hif-1 $\alpha$* , *Ca9*, *Hk2*, *Vegfa*, *Glut1* and *Ldha* in *Alkbh1*-deficient 3T3-L1 lines in hypoxia (n=3). (D) Western blots and (E) qRT-PCR analysis confirm the overactivation of hypoxia axis in *ALKBH1*-overexpressed cells (n=3). The *P* values were calculated by two-tailed Student's *t* test. Scatter plots show individual data points  $\pm$  SD.

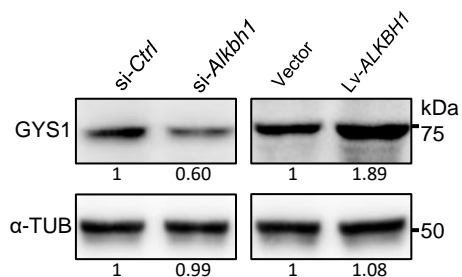

**Figure S3. Positive relationship between ALKBH1 and GYS1 in hypoxia.** Western blots confirms the relationship of ALKBH1 and GYS1 in 5% oxygen. GYS1 work as a target of ALKBH1.

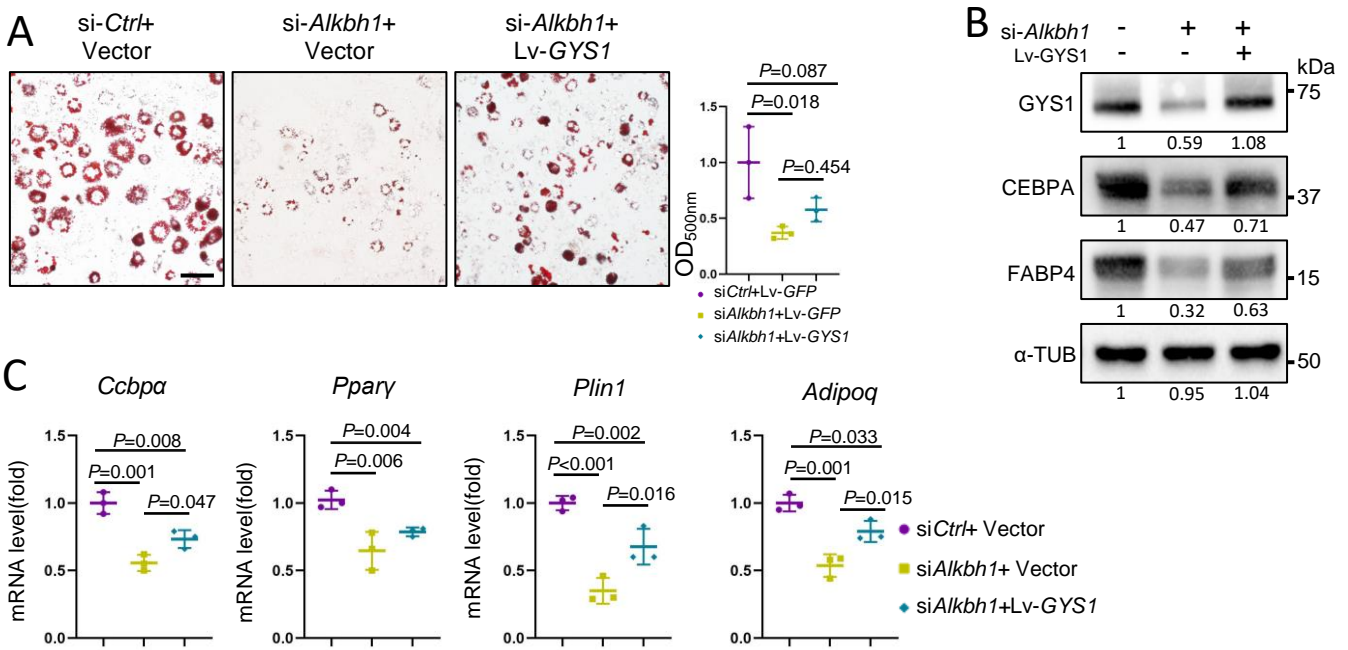

**Figure S4. ALKBH1 demethylates DNA 6mA of GYS1.** (A) Representative images of Oil red O staining in 3T3-L1 cells and quantitation analysis (n=3). Scale bar: 25µm. (B) Western blot analysis of HIF-1α, CEBPA and FABP4. Overexpression of GYS1 failed to fully rescue the decrease of adipogenic markers. (C) qRT-PCR shows the mRNA level of *Cebpa*, *Pparγ*, *Plin1* and *Adipoq* in si-Ctrl+Vector, si-*Alkbh1*+Vector and si-*Alkbh1*+Lv-GYS1 group at 5 days of differentiation (n=3). The P values were calculated one-way ANOVA with Tukey's post hoc test. Scatter plots show individual data points±SD.

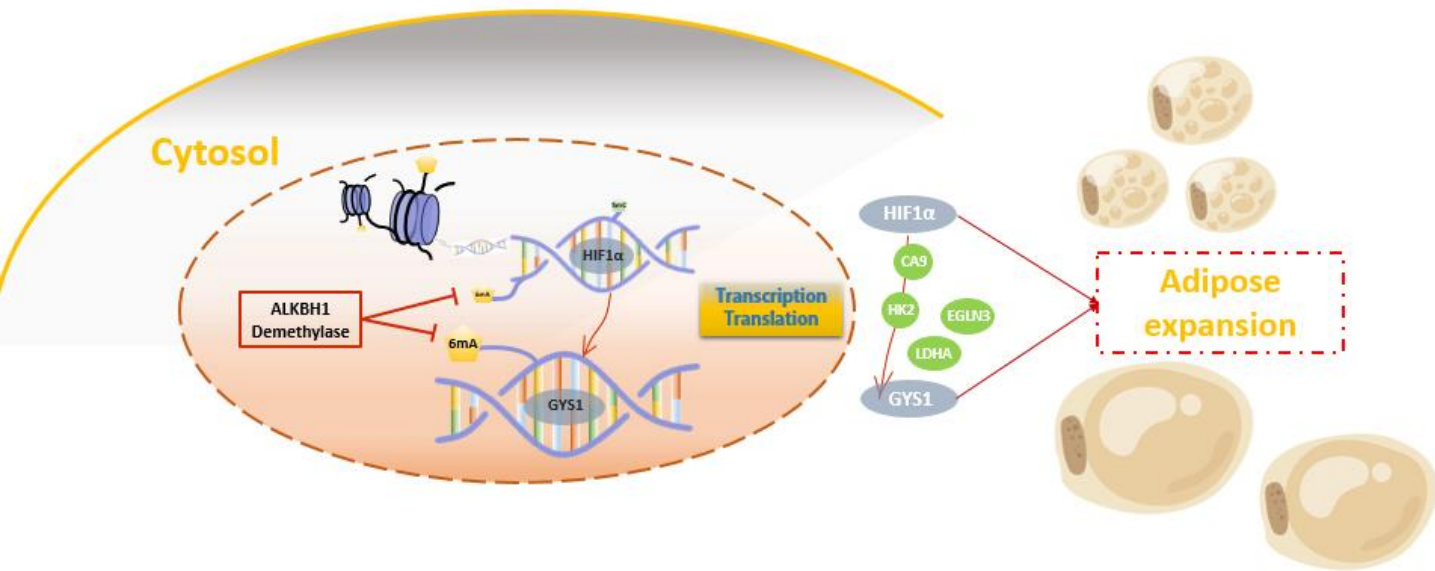

**Figure S5. ALKBH1 enhances adipogenesis through activating HIF-1 axis.** Intranuclear ALKBH1 demethylates the 6mA of *HIF1α* and *GYS1*, leading to the active transcription of these two genes. Numerous transcriptions result in the excessive accumulation of HIF1α and GYS1 proteins. The activation of HIF-1 pathway promotes the adipogenic differentiation of mesenchymal stem cells.

| siRNA sequences |                       |
|-----------------|-----------------------|
| siRNA-sense     | GGUCUAAAGAAGUGACUAATT |
| siRNA-antisense | UUAGUCACUUCUUUAGACCTT |

**Table S1. mouse siRNA sequences used in this study**

**Figure 1B**

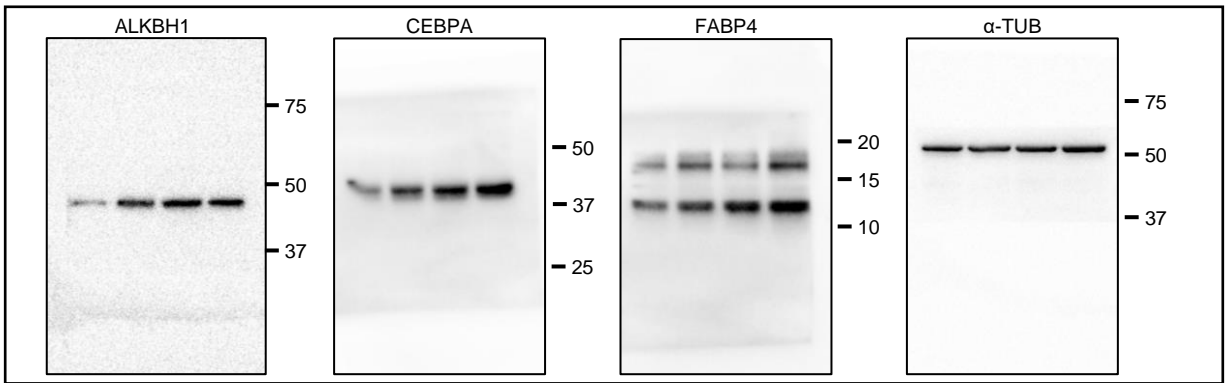

**Figure 1D**

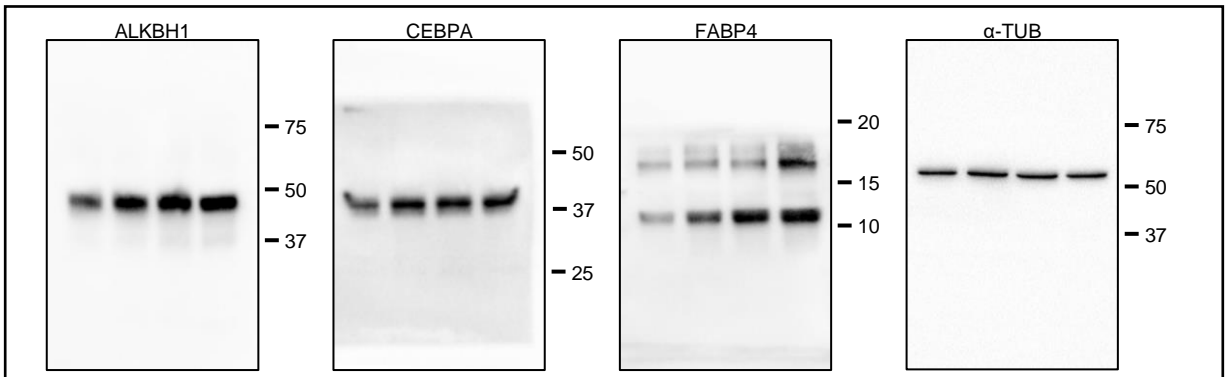

**Figure 2A**

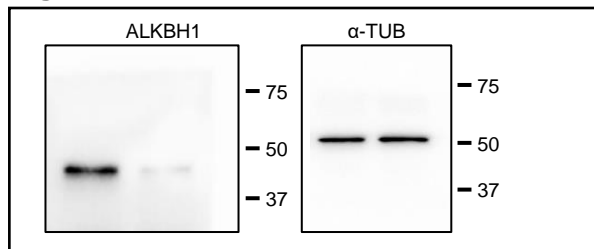

**Figure 2E**

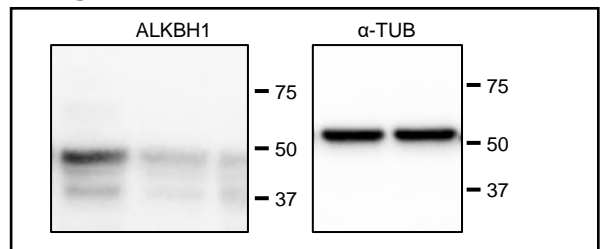

**Figure 3A**

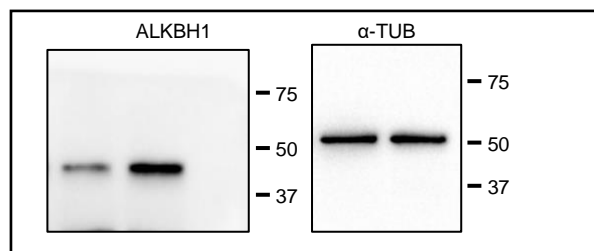

**Figure 3D**

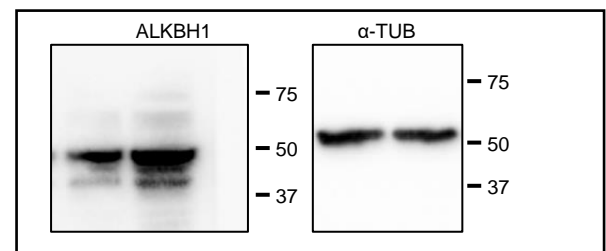

**Figure 4E**

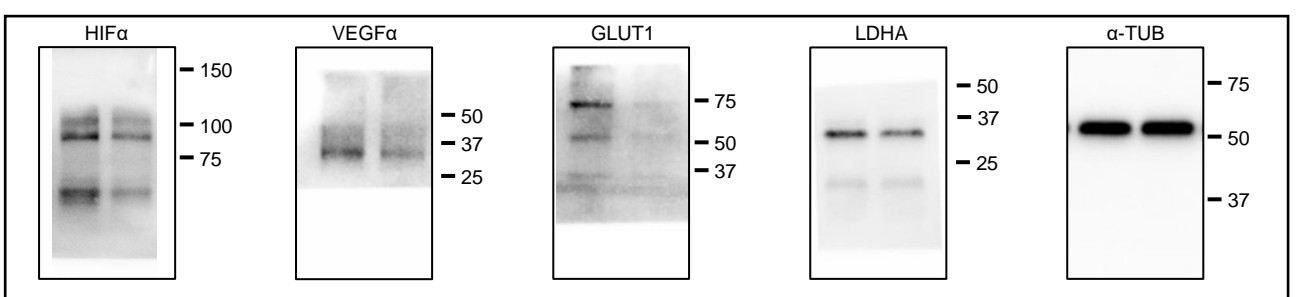

**Figure 4G**

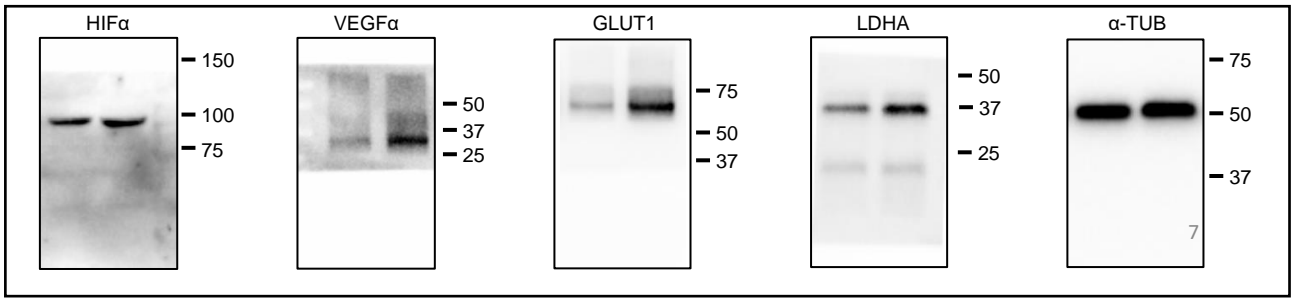

**Figure 5A**

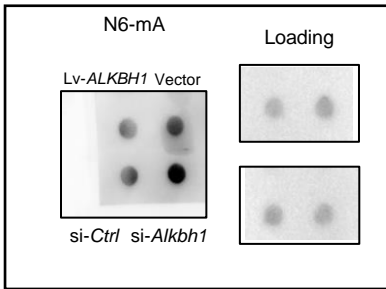

**Figure 5E**

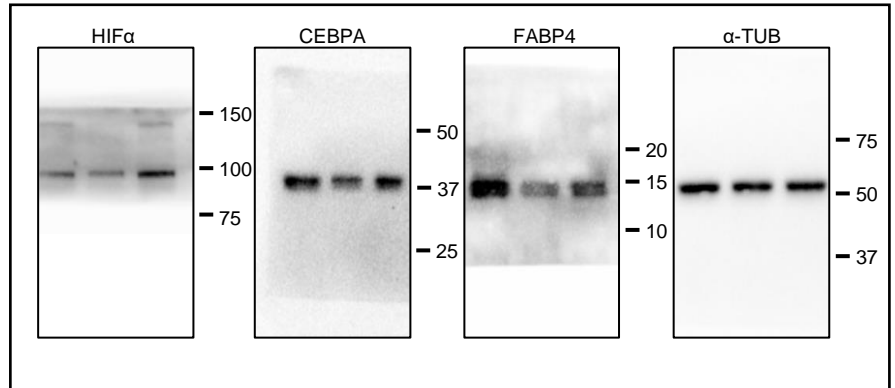

**Figure 6C**

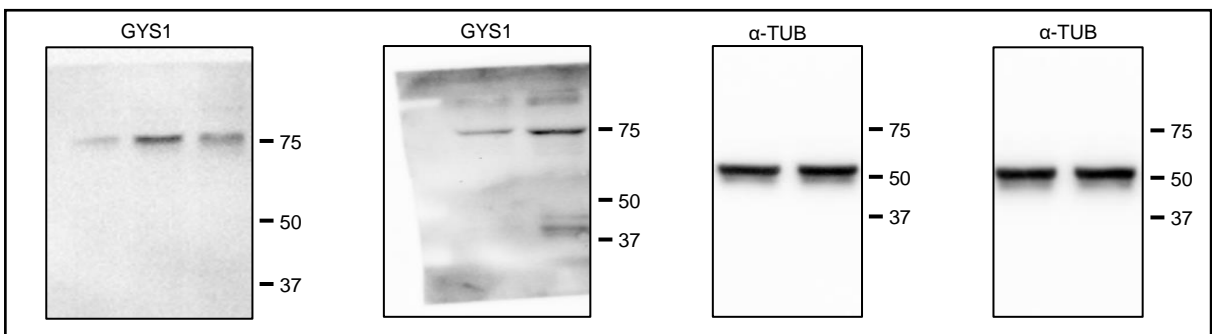

**Figure 6E**

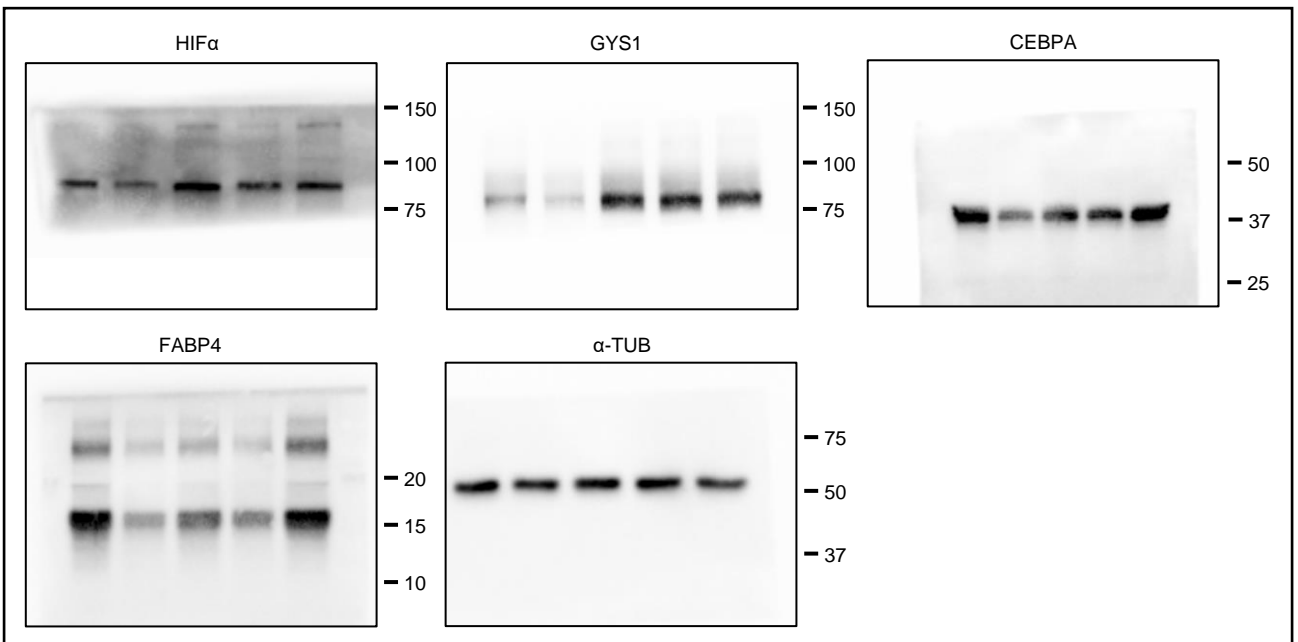

**Figure S1A**

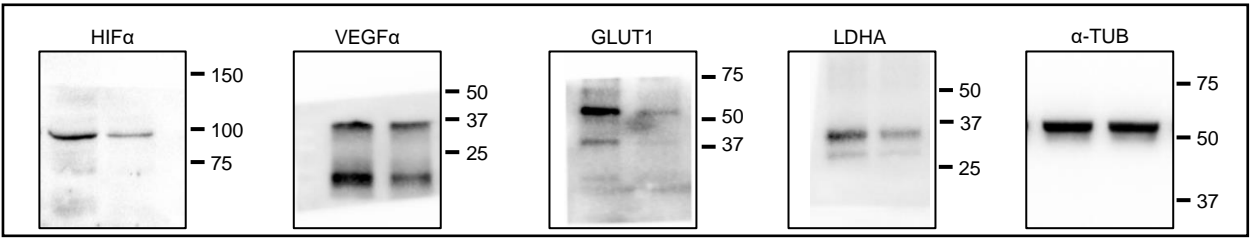

**Figure S1C**

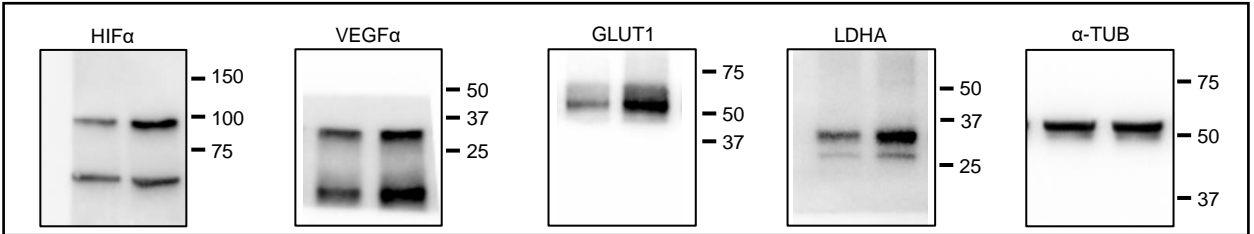

**Figure S2B**

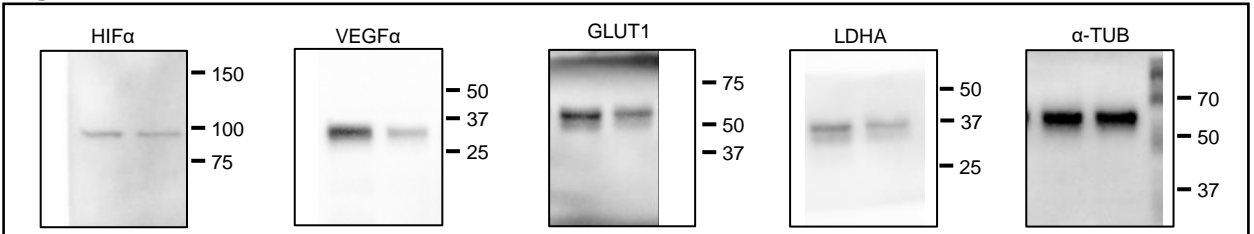

**Figure S2D**

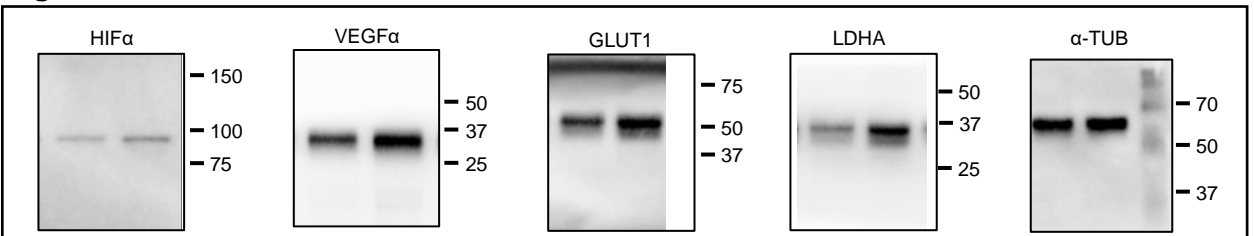

**Figure S3A**

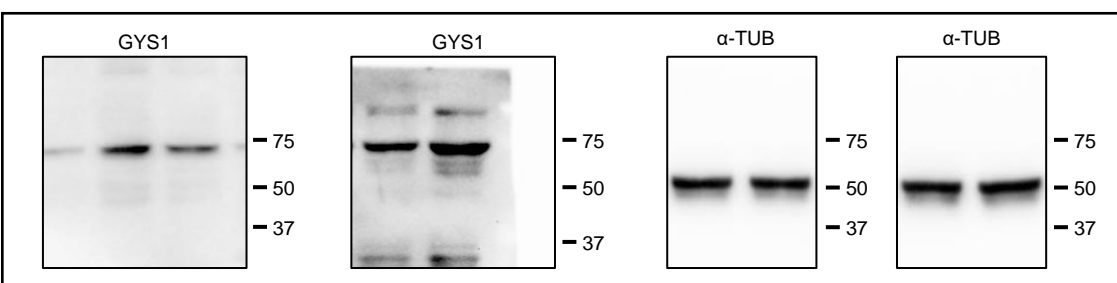

**Figure S4B**

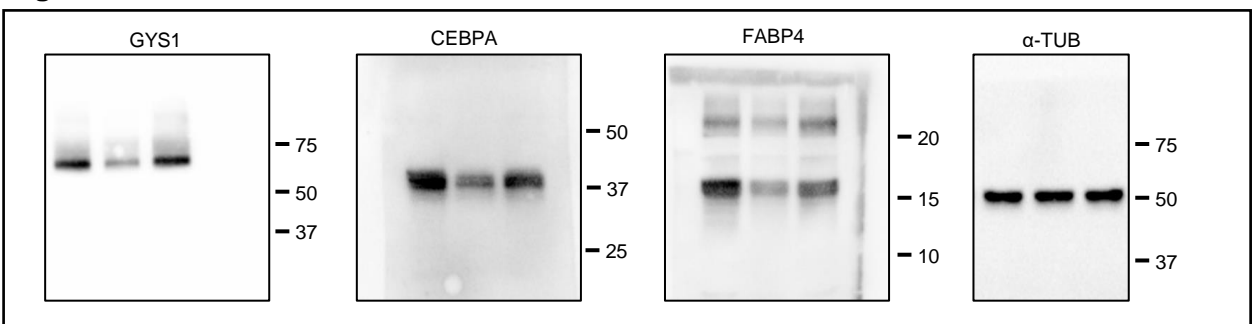

Supplement: mmc1.pdf [file mmc1.pdf]
